# Supplementary material for: Physical activity pattern in Iran: Findings from STEPS 2021
Source: Frontiers journal article supplement (doi:10.3389/fpubh.2022.1036219), 2023-01-04

**Female**

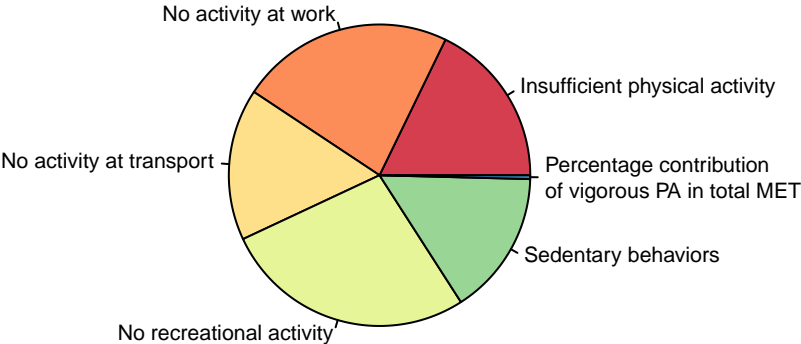

**Male**

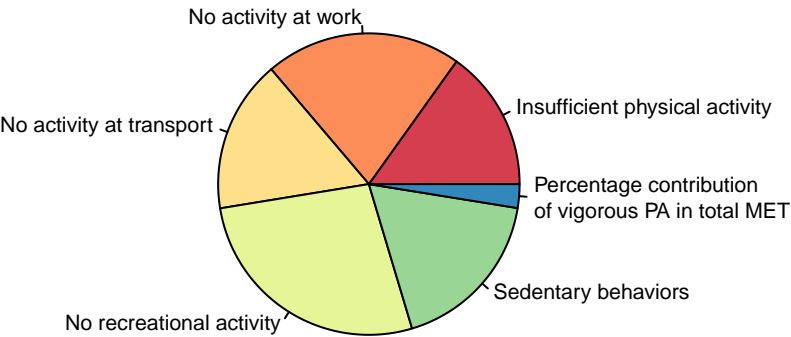

**Total**

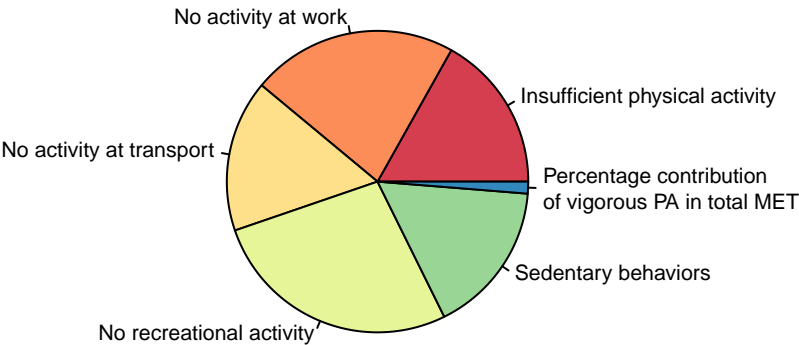

Supplement: Image_1.pdf [file Image_1.pdf]
